# Supplementary material
Source: PubMed Central journal article supplement (PMC5423196)

## Patient ANGPTL4 Expression

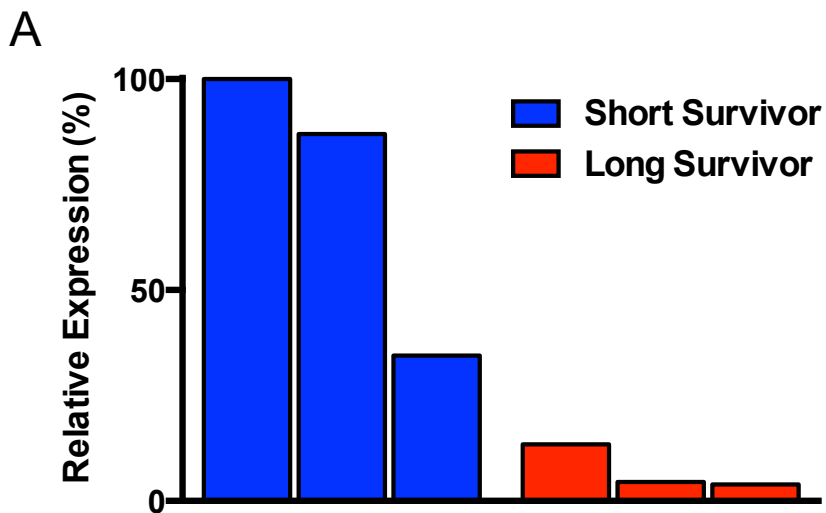

## Cell Line ANGPTL4 Expression

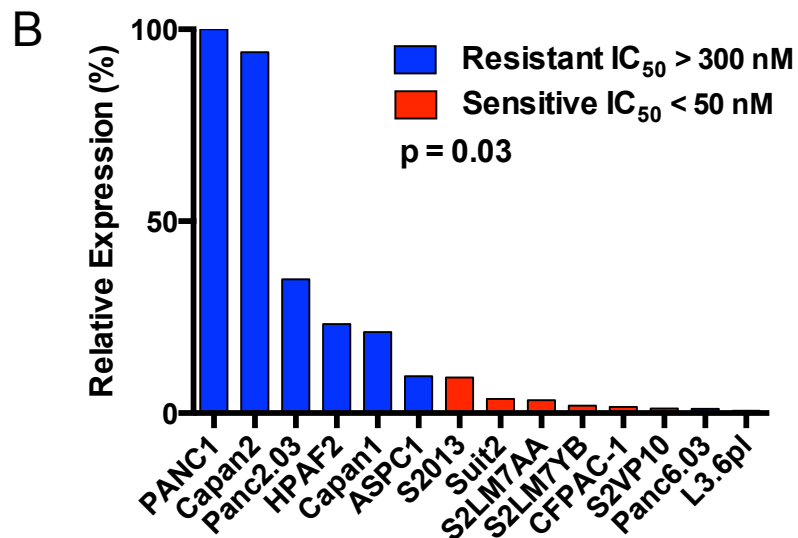

### Training ANGPTL4

$p = 0.00975$

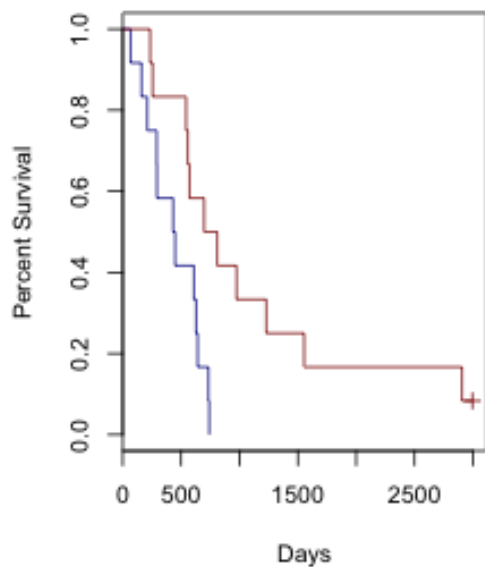

### Validation ANGPTL4

$p = 0.0275$

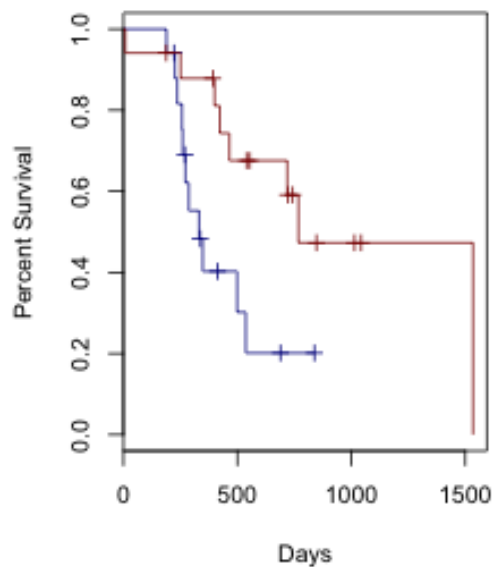

### TCGA ANGPTL4

$p = 0.0131$

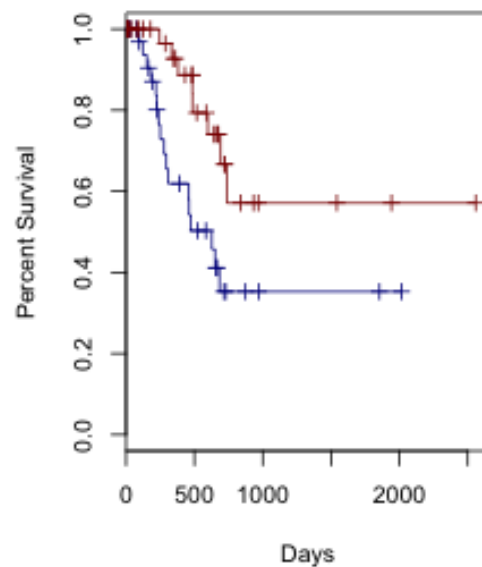

Supplement: MOL2-10-1169-s007.pdf [file MOL2-10-1169-s007.pdf]
