# Supplementary material
Source: PubMed Central journal article supplement (PMC5423196)

**A**

### Subtype ANGPTL4 Expression in Training Cohort

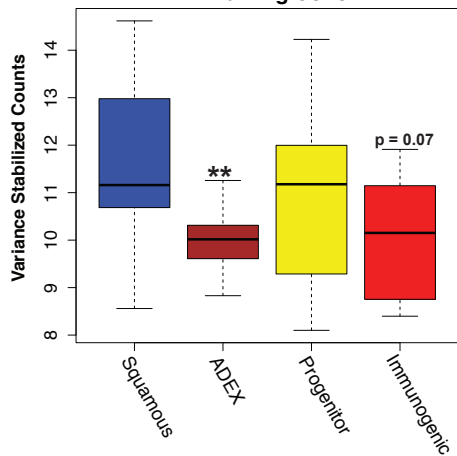**B**

### Subtype ANGPTL4 Expression in Validation Cohort

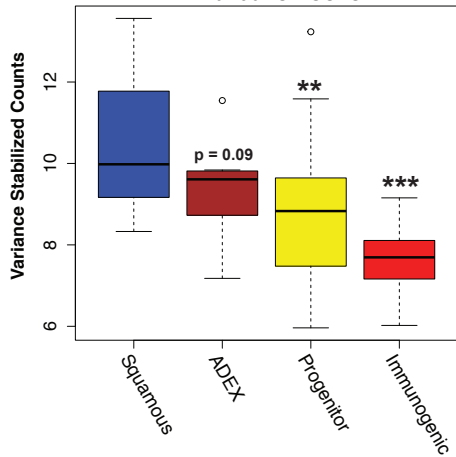**C**

### Squamous Subtype ANGPTL4 Survival Stratification in Training Cohort

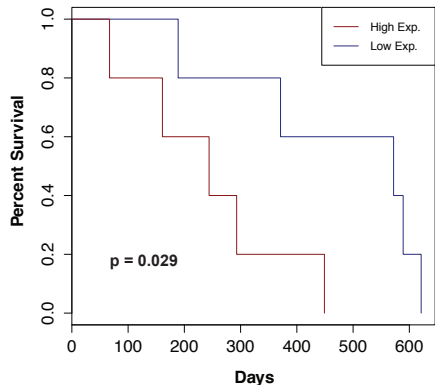**D**

### Squamous Subtype ANGPTL4 Survival Stratification in Validation Cohort

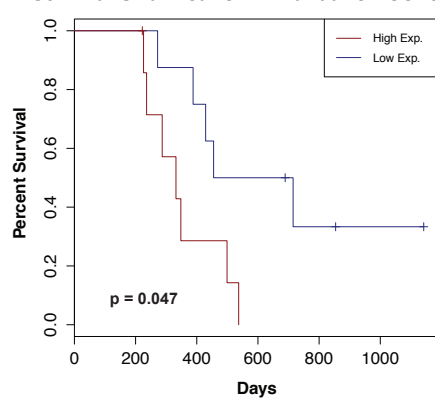

Supplement: MOL2-10-1169-s008.pdf [file MOL2-10-1169-s008.pdf]
