# Supplementary material
Source: PubMed Central journal article supplement (PMC5423196)

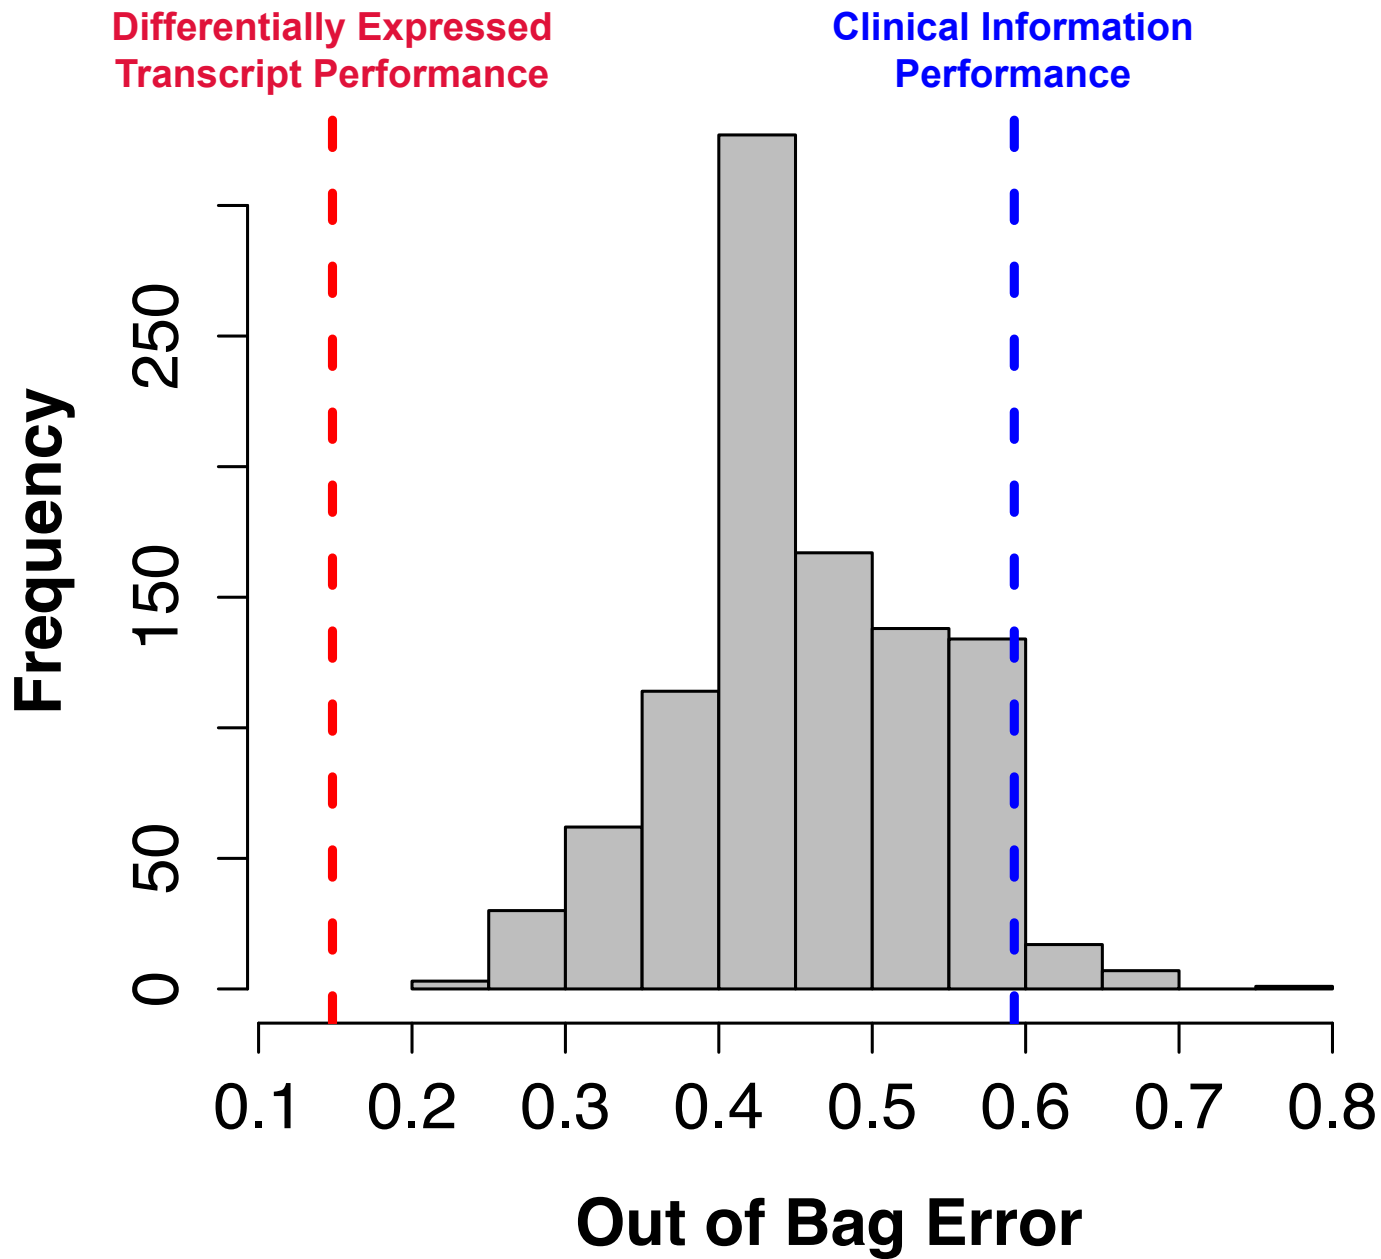

Supplement: MOL2-10-1169-s001.pdf [file MOL2-10-1169-s001.pdf]

**A****Training Cohort**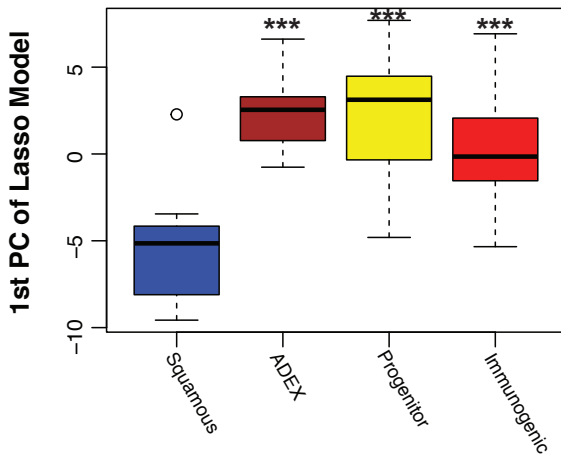**B****Validation Cohort**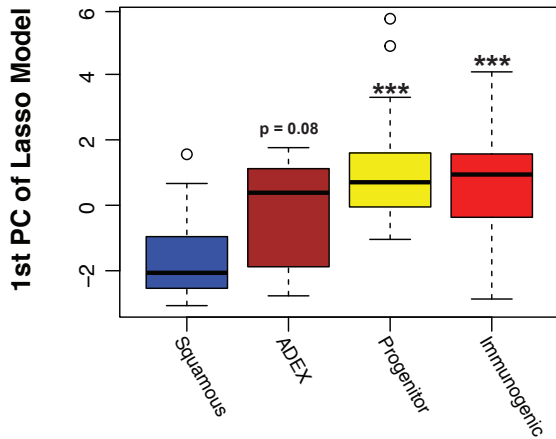

Supplement: MOL2-10-1169-s005.pdf [file MOL2-10-1169-s005.pdf]

**A**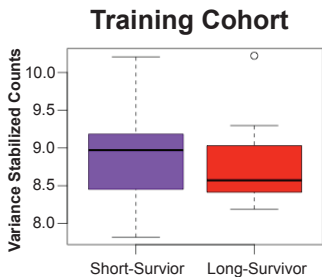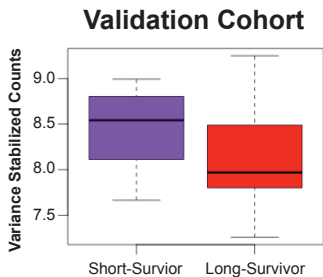**B**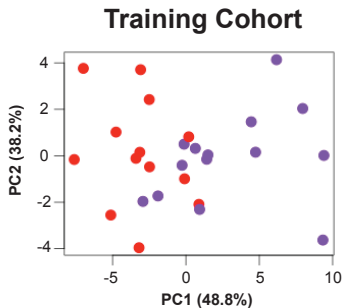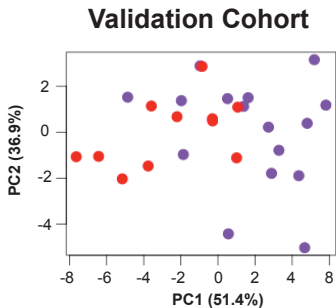

Supplement: MOL2-10-1169-s006.pdf [file MOL2-10-1169-s006.pdf]

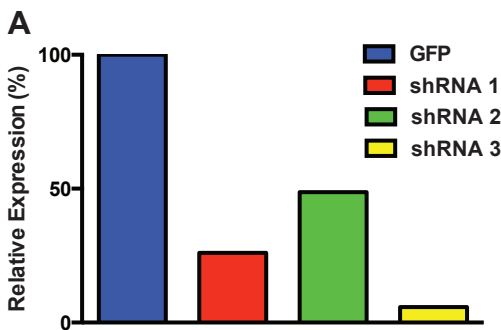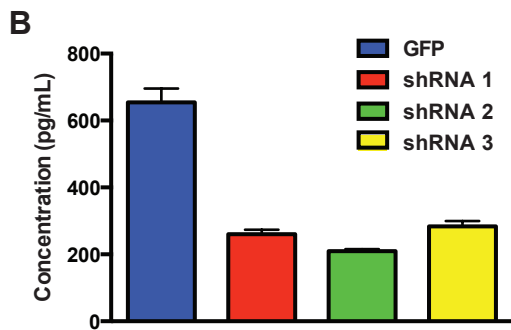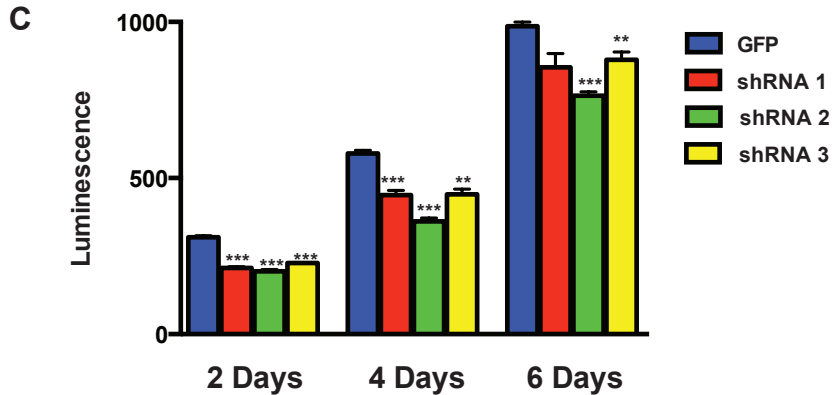

Supplement: MOL2-10-1169-s009.pdf [file MOL2-10-1169-s009.pdf]
